# Supplementary material
Source: Elsevier journal article supplement (https://www.sciencedirect.com/science/article/pii/S0034935618301518)
Supplement: mmc2 [file S0034935618301518:mmc2.pdf]

MD – mean difference, RR – relative risk

- | Quality assessment                                |                                    |              |               |              |                           |                      | № of patients  |                             | Effect                 |                                                 | Quality          | Importance |
|---------------------------------------------------|------------------------------------|--------------|---------------|--------------|---------------------------|----------------------|----------------|-----------------------------|------------------------|-------------------------------------------------|------------------|------------|
| № of studies                                      | Study design                       | Risk of bias | Inconsistency | Indirectness | Imprecision               | Other considerations | Active warming | control (no active warming) | Relative (95% CI)      | Absolute (95% CI)                               |                  |            |
| Infection and complications of the surgical wound |                                    |              |               |              |                           |                      |                |                             |                        |                                                 |                  |            |
| 3                                                 | randomised trials <sup>1,2,3</sup> | not serious  | not serious   | not serious  | serious <sup>a</sup>      | none                 | 20/291 (6.9%)  | 52/291 (17.9%)              | RR 0.40 (0.24 to 0.65) | 107 fewer per 1000 (from 63 fewer to 136 fewer) | ⊕⊕⊕○<br>MODERATE | CRITICAL   |
| All cause mortality                               |                                    |              |               |              |                           |                      |                |                             |                        |                                                 |                  |            |
| 3                                                 | randomised trials <sup>1,3,4</sup> | not serious  | not serious   | not serious  | very serious <sup>b</sup> | none                 | 5/293 (1.7%)   | 6/310 (1.9%)                | RR 0.89 (0.27 to 2.91) | 2 fewer per 1000 (from 14 fewer to 37 more)     | ⊕⊕○○<br>LOW      | IMPORTANT  |
| Major cardiovascular complications                |                                    |              |               |              |                           |                      |                |                             |                        |                                                 |                  |            |

| Quality assessment                    |                                                                           |              |                          |              |                           |                      | No of patients |                             | Effect                 |                                               | Quality                  | Importance |
|---------------------------------------|---------------------------------------------------------------------------|--------------|--------------------------|--------------|---------------------------|----------------------|----------------|-----------------------------|------------------------|-----------------------------------------------|--------------------------|------------|
| No of studies                         | Study design                                                              | Risk of bias | Inconsistency            | Indirectness | Imprecision               | Other considerations | Active warming | control (no active warming) | Relative (95% CI)      | Absolute (95% CI)                             |                          |            |
| 1                                     | randomised trials <sup>4</sup>                                            | not serious  | not serious <sup>a</sup> | not serious  | very serious <sup>b</sup> | none                 | 2/142 (1.4%)   | 10/158 (6.3%)               | RR 0.22 (0.05 to 1.00) | 49 fewer per 1000 (from 0 fewer to 60 fewer)  | ⊕⊕○○<br>LOW <sup>3</sup> | IMPORTANT  |
| Non fatal myocardial infarction       |                                                                           |              |                          |              |                           |                      |                |                             |                        |                                               |                          |            |
| 1                                     | randomised trials <sup>4</sup>                                            | not serious  | not serious <sup>a</sup> | not serious  | very serious <sup>b</sup> | none                 | 0/142 (0.0%)   | 1/158 (0.6%)                | RR 0.37 (0.02 to 9.03) | 4 fewer per 1000 (from 6 fewer to 51 more)    | ⊕⊕○○<br>LOW              | IMPORTANT  |
| Non fatal cardiac arrest              |                                                                           |              |                          |              |                           |                      |                |                             |                        |                                               |                          |            |
| 1                                     | randomised trials <sup>4</sup>                                            | not serious  | not serious <sup>c</sup> | not serious  | very serious <sup>b</sup> | none                 | 0/142 (0.0%)   | 2/158 (1.3%)                | RR 0.22 (0.01 to 4.59) | 10 fewer per 1000 (from 13 fewer to 45 more)  | ⊕⊕○○<br>LOW              | IMPORTANT  |
| Patients transfused                   |                                                                           |              |                          |              |                           |                      |                |                             |                        |                                               |                          |            |
| 8                                     | randomised trials <sup>1,3,5,6,7,8,9,10</sup>                             | not serious  | not serious              | not serious  | serious <sup>b</sup>      | none                 | 64/298 (21.5%) | 102/310 (32.9%)             | RR 0.72 (0.46 to 1.14) | 92 fewer per 1000 (from 46 more to 178 fewer) | ⊕⊕⊕○<br>MODERATE         | CRITICAL   |
| Fluids transfused during surgery - mL |                                                                           |              |                          |              |                           |                      |                |                             |                        |                                               |                          |            |
| 17                                    | randomised trials <sup>1,4,5,7,8,9,11,12,13,14,15,16,17,18,19,20,21</sup> | not serious  | serious <sup>d</sup>     | not serious  | not serious               | none                 | 541            | 538                         | -                      | MD 178,22 fewer (from 277 fewer to 79 fewer)  | ⊕⊕⊕○<br>MODERATE         | IMPORTANT  |

## References

1. Kurz A, Sessler DI, Lenhardt R. Perioperative normothermia to reduce the incidence of surgical-wound infection and shorten hospitalization. Study of Wound Infection and Temperature Group. *New England Journal of Medicine* 1996;334(19):1209-15.
2. Melling AC, Ali B, Scott EM, Leaper DJ. Effects of preoperative warming on the incidence of wound infection after clean surgery: a randomised controlled trial. *Lancet* 2001;358(9285):876-80.
3. Wong PF, Kumar S, Bohra A, Whetter D, Leaper DJ. Randomized clinical trial of perioperative systemic warming in major elective abdominal surgery. *The British Journal of Surgery* 2007;94(4):421-6.
4. Frank SM, Fleisher LA, Breslow MJ, Higgins MS, Olson KF, Kelly S, et al. Perioperative maintenance of normothermia reduces the incidence of morbid cardiac events. A randomized clinical trial. *JAMA* 1997;277(14):1127-34.
5. Bock M, Müller J, Bach A, Böhrer H, Martin E, Motsch J. Effects of preinduction and intraoperative warming during major laparotomy. *British Journal of Anaesthesia* 1998;80(2):159-63.
6. Campos-Suárez JM, Casas-Vila JI, Litvan-Suquieni H, Villar-Landeira JM. Air-convection heater for abdominal surgery. Study of the relation between surgical time and the efficacy of body temperature maintenance. *Revista Española de Anestesiología y Reanimación* 1997;44(2):47-51.
7. Johansson T, Lisander B, Ivarsson I. Mild hypothermia does not increase blood loss during total hip arthroplasty. *Acta Anaesthesiologica Scandinavica* 1999;43(10):1005-10.
8. Kabbara A, Goldlust SA, Smith CE, Hagen JF, Pinchak AC. Randomized prospective comparison of forced air warming using hospital blankets versus commercial blankets in surgical patients. *Anesthesiology* 2002;97(2):338-44.
9. Schmied H, Kurz A, Sessler DI, Kozek S, Reiter A. Mild hypothermia increases blood loss and transfusion requirements during total hip arthroplasty. *Lancet* 1996;347(8997):289-92.
10. Bennett J, Ramachandra V, Webster J, Carli F. Prevention of hypothermia during hip surgery: effect of passive compared with active skin surface warming. *British Journal of Anaesthesia* 1994;73(2):180-3.
11. Butwick AJ, Lipman SS, Carvalho B. Intraoperative forced air-warming during cesarean delivery under spinal anesthesia does not prevent maternal hypothermia. *Anesthesia and Analgesia* 2007;105(5):1413-9.
12. Casati A, Fanelli G, Ricci A, Musto P, Cedrati V, Altimari G, et al. Shortening the discharging time after total hip replacement under combined spinal/epidural anesthesia by actively warming the patient during surgery. *Minerva Anestesiologica* 1999;65(7-8):507-14.
13. Chung SH, Lee BS, Yang HJ, Kweon KS, Kim HH, Song J, et al. Effect of preoperative warming during cesarean section under spinal anesthesia. *Korean Journal of Anesthesiology* 2012;62(5):454-60.
14. D'Angelo Vanni SM, Castiglia YM, Ganem EM, Rodrigues Júnior GR, Amorim RB, Ferrari F, et al. Preoperative warming combined with intraoperative skin-surface warming does not avoid hypothermia caused by spinal anesthesia in patients with midazolam premedication. *São Paulo Medical Journal* 2007;125(3):144-9.
15. Mason DS, Sapala JA, Wood MH, Sapala MA. Influence of a forced air warming system on morbidly obese patients undergoing Roux-en-Y gastric bypass. *Obesity Surgery* 1998;8(4):453-60.
16. Rasmussen YH, Leikersfeldt G, Drenck NE. Forced-air surface warming versus oesophageal heat exchanger in the prevention of perioperative hypothermia. *Acta Anaesthesiologica Scandinavica* 1998;42(3):348-52.

MD – mean difference, RR – relative risk

- 95% of CI includes appreciable benefit or harm
- 95%CI includes large benefit or harm

| Quality assessment                    |                                  |              |               |              |                      |                      | № of patients      |                          | Effect            |                                              | Quality          | Importance |
|---------------------------------------|----------------------------------|--------------|---------------|--------------|----------------------|----------------------|--------------------|--------------------------|-------------------|----------------------------------------------|------------------|------------|
| № of studies                          | Study design                     | Risk of bias | Inconsistency | Indirectness | Imprecision          | Other considerations | Forced-air warming | electric heating systems | Relative (95% CI) | Absolute (95% CI)                            |                  |            |
| Fluids transfused during surgery - mL |                                  |              |               |              |                      |                      |                    |                          |                   |                                              |                  |            |
| 2                                     | randomised trials <sup>1,2</sup> | not serious  | not serious   | not serious  | Serious <sup>a</sup> | none                 | 88                 | 85                       | -                 | MD 97,11 more (from 20,76 fewer to 215 more) | ⊕⊕⊕○<br>MODERATE | IMPORTANT  |
| Infection of surgical wound           |                                  |              |               |              |                      |                      |                    |                          |                   |                                              |                  |            |

| Quality assessment      |                                |              |               |              |                           |                      | № of patients      |                          | Effect                  |                                               | Quality     | Importance |
|-------------------------|--------------------------------|--------------|---------------|--------------|---------------------------|----------------------|--------------------|--------------------------|-------------------------|-----------------------------------------------|-------------|------------|
| № of studies            | Study design                   | Risk of bias | Inconsistency | Indirectness | Imprecision               | Other considerations | Forced-air warming | electric heating systems | Relative (95% CI)       | Absolute (95% CI)                             |             |            |
| 1                       | randomised trials <sup>3</sup> | not serious  | not serious   | not serious  | very serious <sup>b</sup> | none                 | 1/29 (3.4%)        | 1/30 (3.3%)              | RR 1.03 (0.07 to 15.77) | 1 more per 1000 (from 31 fewer to 429 more)   | ⊕⊕○○<br>LOW | CRITICAL   |
| Transfusions - patients |                                |              |               |              |                           |                      |                    |                          |                         |                                               |             |            |
| 1                       | randomised trials <sup>3</sup> | not serious  | not serious   | not serious  | very serious <sup>b</sup> | none                 | 14/29 (48.3%)      | 12/30 (40.0%)            | RR 1.21 (0.68 to 2.15)  | 84 more per 1000 (from 128 fewer to 460 more) | ⊕⊕○○<br>LOW | CRITICAL   |

References

1. Leung KK, Lai A, Wu A. A randomised controlled trial of the electric heating pad vs forced-air warming for preventing hypothermia during laparotomy. *Anaesthesia* 2007;62(6):605-8.
2. Ng V, Lai A, Ho V. Comparison of forced-air warming and electric heating pad for maintenance of body temperature during total knee replacement. *Anaesthesia* 2006;61(11):1100-4.
3. Hofer CK, Worn M, Tavakoli R, Sander L, Maloigne M, Klaghofer R, et al. Influence of body core temperature on blood loss and transfusion requirements during off-pump coronary artery bypass grafting: a comparison of 3 warming systems. *The Journal of Thoracic and Cardiovascular Surgery* 2005;129(4):838-43.

Tabla 17: Aire caliente conectivo frente a sistemas de circulación de agua caliente

MD – mean difference, RR – relative risk

- a. Low number of events; 95% of CI includes appreciable benefit or harm
- b. Low number of events
- c. High variability of effects among studies
- d. 95%CI includes large benefit or harm

| Quality assessment                    |                                    |              |                      |              |                           |                      | № of patients      |                                | Effect                  |                                                 | Quality          | Importance |
|---------------------------------------|------------------------------------|--------------|----------------------|--------------|---------------------------|----------------------|--------------------|--------------------------------|-------------------------|-------------------------------------------------|------------------|------------|
| № of studies                          | Study design                       | Risk of bias | Inconsistency        | Indirectness | Imprecision               | Other considerations | Forced-air warming | warm water circulation systems | Relative (95% CI)       | Absolute (95% CI)                               |                  |            |
| Infection of surgical wound           |                                    |              |                      |              |                           |                      |                    |                                |                         |                                                 |                  |            |
| 3                                     | randomised trials <sup>1,2,3</sup> | not serious  | not serious          | not serious  | very serious <sup>a</sup> | none                 | 5/104 (4.8%)       | 1/104 (1.0%)                   | RR 3.00 (0.62 to 14.53) | 19 more per 1000 (from 4 fewer to 130 more)     | ⊕⊕○○<br>LOW      | CRITICAL   |
| Transfusions - patients               |                                    |              |                      |              |                           |                      |                    |                                |                         |                                                 |                  |            |
| 2                                     | randomised trials <sup>1,3</sup>   | not serious  | not serious          | not serious  | serious <sup>b</sup>      | none                 | 27/54 (50.0%)      | 18/54 (33.3%)                  | RR 1.59 (0.48 to 5.24)  | 197 more per 1000 (from 173 fewer to 1000 more) | ⊕⊕⊕○<br>MODERATE | CRITICAL   |
| Fluids transfused during surgery - mL |                                    |              |                      |              |                           |                      |                    |                                |                         |                                                 |                  |            |
| 3                                     | randomised trials <sup>2,4,5</sup> | not serious  | serious <sup>c</sup> | not serious  | serious <sup>d</sup>      | none                 | 94                 | 90                             | -                       | MD 315,65 fewer (from 899 fewer to 268 more)    | ⊕⊕○○<br>LOW      | IMPORTANT  |

## References

1. Calcaterra D, Ricci M, Lombardi P, Katariya K, Panos A, Salerno TA. Reduction of postoperative hypothermia with a new warming device: a prospective randomized study in off-pump coronary artery surgery. The Journal of Cardiovascular Surgery 2009;50(6):813-7.
2. Elmore JR, Franklin DP, Youkey JR, Oren JW, Frey CM. Normothermia is protective during infrarenal aortic surgery. Journal of Vascular Surgery 1998;28(6):984-92.
3. Hofer CK, Worn M, Tavakoli R, Sander L, Maloigne M, Klaghofer R, et al. Influence of body core temperature on blood loss and transfusion requirements during off-pump coronary artery bypass grafting: a comparison of 3 warming systems. The Journal of Thoracic and Cardiovascular Surgery 2005;129(4):838-43.

4. Janicki PK, Higgins MS, Janssen J, Johnson RF, Beattie C. Comparison of two different temperature maintenance strategies during open abdominal surgery: upper body forced-air warming versus whole body water garment. *Anesthesiology* 2001;95(4):868-74.

5. Zangrillo A, Pappalardo F, Talò G, Corno C, Landoni G, Scandroglio A, et al. Temperature management during off-pump coronary artery bypass graft surgery: a randomized clinical trial on the efficacy of a circulating water system versus a forced-air system. *Journal of Cardiothoracic and Vascular Anesthesia* 2006;20(6):788-92.

**Tabla 18: Aire conectivo frente a calor radiante**

MD – mean difference, RR – relative risk

a. 95%CI includes large benefit or harm

| Quality assessment          |                                |              |               |              |                           |                      | № of patients      |                          | Effect                 |                                              | Quality     | Importance |
|-----------------------------|--------------------------------|--------------|---------------|--------------|---------------------------|----------------------|--------------------|--------------------------|------------------------|----------------------------------------------|-------------|------------|
| № of studies                | Study design                   | Risk of bias | Inconsistency | Indirectness | Imprecision               | Other considerations | Forced-air warming | electric heating systems | Relative (95% CI)      | Absolute (95% CI)                            |             |            |
| Infection of surgical wound |                                |              |               |              |                           |                      |                    |                          |                        |                                              |             |            |
| 1                           | randomised trials <sup>1</sup> | not serious  | not serious   | not serious  | very serious <sup>a</sup> | none                 | 8/139 (5.8%)       | 5/140 (3.6%)             | RR 1.61 (0.54 to 4.80) | 22 more per 1000 (from 16 fewer to 136 more) | ⊕⊕○○<br>LOW | CRITICAL   |

References

1. Melling AC, Ali B, Scott EM, Leaper DJ. Effects of preoperative warming on the incidence of wound infection after clean surgery: a randomised controlled trial. *Lancet* 2001;358(9285):876-80

Tabla 19: Sistemas de calentamiento eléctrico frente a sistemas de circulación de agua caliente

MD – mean difference, RR – relative risk

- a. Single study
- b. Low number of events; 95% of CI includes appreciable benefit or harm

| Quality assessment               |                                                                                      |              |                          |              |                           |                      | № of patients             |                                | Effect                  |                                              | Quality     | Importance |
|----------------------------------|--------------------------------------------------------------------------------------|--------------|--------------------------|--------------|---------------------------|----------------------|---------------------------|--------------------------------|-------------------------|----------------------------------------------|-------------|------------|
| № of studies                     | Study design                                                                         | Risk of bias | Inconsistency            | Indirectness | Imprecision               | Other considerations | Resistive heating systems | warm water circulation systems | Relative (95% CI)       | Absolute (95% CI)                            |             |            |
| Infections of the surgical wound |                                                                                      |              |                          |              |                           |                      |                           |                                |                         |                                              |             |            |
| 1                                | randomised trials <small>iError! No se encuentra el origen de la referencia.</small> | not serious  | not serious <sup>a</sup> | not serious  | very serious <sup>b</sup> | none                 | 1/30 (3.3%)               | 0/29 (0.0%)                    | OR 3.00 (0.12 to 76.68) | 0 fewer per 1000 (from 0 fewer to 0 fewer)   | ⊕⊕○○<br>LOW | CRITICAL   |
| Patients transfused              |                                                                                      |              |                          |              |                           |                      |                           |                                |                         |                                              |             |            |
| 1                                | randomised trials <sup>1</sup>                                                       | not serious  | not serious <sup>a</sup> | not serious  | very serious <sup>b</sup> | none                 | 12/30 (40.0%)             | 5/29 (17.2%)                   | OR 3.20 (0.96 to 10.72) | 228 more per 1000 (from 6 fewer to 518 more) | ⊕⊕○○<br>LOW | CRITICAL   |

References

1. Hofer CK, Worn M, Tavakoli R, Sander L, Maloigne M, Klaghofer R, et al. Influence of body core temperature on blood loss and transfusion requirements during off-pump coronary artery bypass grafting: a comparison of 3 warming systems. The Journal of Thoracic and Cardiovascular Surgery 2005;129(4):838-43.



**Tabla 20: Estrategias de precalentamiento previas a la inducción anestésica**

CI: Confidence interval; RR: Risk ratio; MD: Mean difference

- a. Low number of events
- b. Single study
- c. High variability of effects among studies
- d. 95%CI of effect estimate includes benefit or harm
- e. Very low number of events; 95%CI includes appreciable benefit or harm

| Quality assessment                                   |                                        |              |                      |                      |                      |                      | № of patients |                | Effect                 |                                                 | Quality       | Importance |
|------------------------------------------------------|----------------------------------------|--------------|----------------------|----------------------|----------------------|----------------------|---------------|----------------|------------------------|-------------------------------------------------|---------------|------------|
| № of studies                                         | Study design                           | Risk of bias | Inconsistency        | Indirectness         | Imprecision          | Other considerations | Active        | no active      | Relative (95% CI)      | Absolute (95% CI)                               |               |            |
| Infection and complications of the surgical wound    |                                        |              |                      |                      |                      |                      |               |                |                        |                                                 |               |            |
| 2                                                    | randomised trials <sup>1,2</sup>       | not serious  | not serious          | not serious          | serious <sup>a</sup> | none                 | 14/187 (7.5%) | 34/195 (17.4%) | RR 0.44 (0.25 to 0.80) | 98 fewer per 1000 (from 35 fewer to 131 fewer)  | ⊕⊕⊕○ MODERATE | CRITICAL   |
| Patients transfused                                  |                                        |              |                      |                      |                      |                      |               |                |                        |                                                 |               |            |
| 2                                                    | randomised trials <sup>2,3</sup>       | not serious  | not serious          | serious <sup>c</sup> | serious <sup>a</sup> | none                 | 14/67 (20.9%) | 34/76 (44.7%)  | RR 0.40 (0.12 to 1.35) | 268 fewer per 1000 (from 157 more to 394 fewer) | ⊕⊕○○ LOW      | CRITICAL   |
| Fluids transfused during surgery - mL - Preoperative |                                        |              |                      |                      |                      |                      |               |                |                        |                                                 |               |            |
| 5                                                    | randomised trials <sup>3,4,5,6,7</sup> | not serious  | serious <sup>c</sup> | not serious          | serious <sup>d</sup> | none                 | 71            | 61             | -                      | 141.58 fewer (341.16 fewer to 58.01 more)       | ⊕⊕○○ LOW      | IMPORTANT  |

| Quality assessment  |                                |              |                          |              |                           |                      | № of patients  |                | Effect                    |                                                  | Quality     | Importance |
|---------------------|--------------------------------|--------------|--------------------------|--------------|---------------------------|----------------------|----------------|----------------|---------------------------|--------------------------------------------------|-------------|------------|
| № of studies        | Study design                   | Risk of bias | Inconsistency            | Indirectness | Imprecision               | Other considerations | Active         | no active      | Relative (95% CI)         | Absolute (95% CI)                                |             |            |
| All cause mortality |                                |              |                          |              |                           |                      |                |                |                           |                                                  |             |            |
| 1                   | randomised trials <sup>2</sup> | not serious  | not serious <sup>b</sup> | not serious  | very serious <sup>e</sup> | none                 | 1/47<br>(2.1%) | 2/56<br>(3.6%) | RR 0.60<br>(0.06 to 6.37) | 14 fewer per 1000<br>(from 34 fewer to 192 more) | ⊕⊕○○<br>LOW | IMPORTANT  |

# References

1. Melling AC, Ali B, Scott EM, Leaper DJ. Effects of preoperative warming on the incidence of wound infection after clean surgery: a randomised controlled trial. *Lancet* 2001;358(9285):876-80.
2. Wong PF, Kumar S, Bohra A, Whetter D, Leaper DJ. Randomized clinical trial of perioperative systemic warming in major elective abdominal surgery. *The British Journal of Surgery* 2007;94(4):421-6.
3. Bock M, Müller J, Bach A, Böhrer H, Martin E, Motsch J. Effects of preinduction and intraoperative warming during major laparotomy. *British Journal of Anaesthesia* 1998;80(2):159-63.
4. Chung SH, Lee BS, Yang HJ, Kweon KS, Kim HH, Song J, et al. Effect of preoperative warming during cesarean section under spinal anesthesia. *Korean Journal of Anesthesiology* 2012;62(5):454-60.
5. D'Angelo Vanni SM, Castiglia YM, Ganem EM, Rodrigues Júnior GR, Amorim RB, Ferrari F, et al. Preoperative warming combined with intraoperative skin-surface warming does not avoid hypothermia caused by spinal anesthesia in patients with midazolam premedication. *São Paulo Medical Journal* 2007;125(3):144-9.
6. Just B, Trévien V, Delva E, Lienhart A. Prevention of intraoperative hypothermia by preoperative skin-surface warming. *Anesthesiology* 1993;79(2):214-8.
7. Camus Y, Delva E, Sessler DI, Lienhart A. Pre-induction skin-surface warming minimizes intraoperative core hypothermia. *Journal of Clinical Anesthesia* 1995;7(5):384-8.
