# Supplementary material
Source: Elsevier journal article supplement (https://www.sciencedirect.com/science/article/pii/S0034935618301518)
Supplement: mmc4 [file S0034935618301518:mmc4.pdf]

Soluciones de Normotermia

# Los grados importan.

Las acciones activas llevan a unos mejores resultados en el paciente

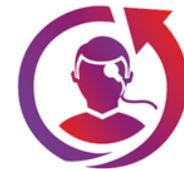

Soluciones de Normotermia

## ¿Sabía qué...?

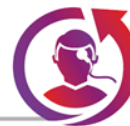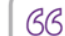

La hipotermia perioperatoria es aún un problema clínico que presenta una alta incidencia y asociado a complicaciones severas.<sup>1</sup>

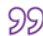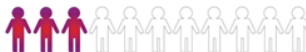

**Solo al 30%**

de los pacientes se le aplican medidas de calor activo durante la cirugía.<sup>2</sup>

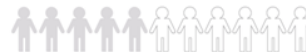

**Al menos el 50%**

de los pacientes tras una cirugía sufren un episodio de hipotermia.<sup>3</sup>

**La hipotermia no  
intencionada es  
fácilmente evitable**

Soluciones de Normotermia

## Los beneficios

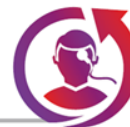

Los estudios clínicos demuestran que el mantener la Temperatura Central del paciente por encima de 36°C da como resultado:

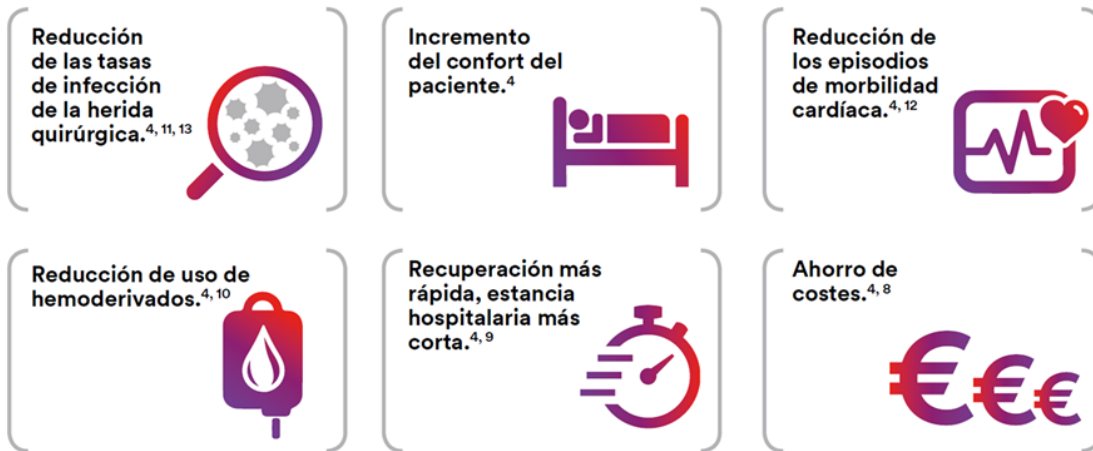

Soluciones de Normotermia

# Los efectos de la anestesia

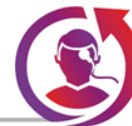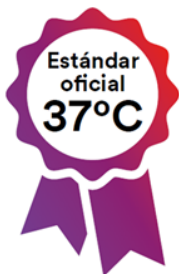

**Normotermia**  
=estado térmico ideal del cuerpo humano

**Hipotermia Clínica**  
=Temperatura Central del cuerpo por debajo de 36°C

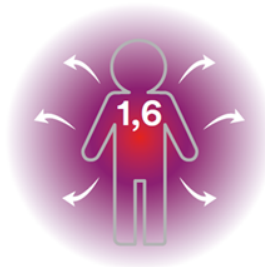

Los pacientes pueden perder hasta 1,6°C de Temperatura Central en los primeros 60 minutos de anestesia

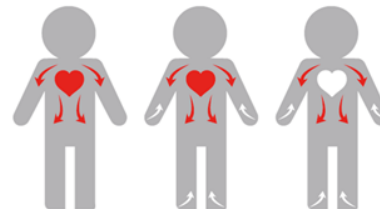

La anestesia provoca una **vasodilatación**, que permite a la sangre fluir libremente a las zonas periféricas del cuerpo que están más frías

A medida que la sangre circula se enfría, volviendo al corazón y provocando un descenso de la Temperatura Central.

Soluciones de Normotermia

## La importancia de mantener el estado de normotermia

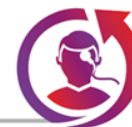

### La Temperatura es un signo vital

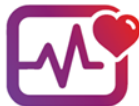

Si el paciente está por debajo de los 36°C es necesario comenzar el calentamiento activo.<sup>6</sup>

**Tenga cuidado, cuide de la Temperatura Central**

### Monitorizar

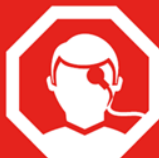

Medida continua de la Temperatura Central, antes, durante y después de la cirugía.

Registre la Temperatura Central del paciente cada 30 minutos durante la cirugía y cada 15 minutos en la sala de Reanimación.<sup>6</sup>

### Pre-calentar

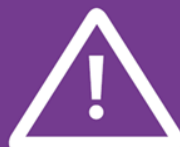

Pre-caliente para incrementar la temperatura periférica del cuerpo.

Comience el calentamiento activo 30 minutos antes de la inducción anestésica.<sup>6</sup>

### Mantener

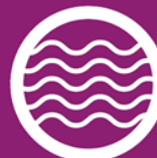

Asegúrese de que el paciente está en o por encima de 36 °C a lo largo del procedimiento quirúrgico completo.

Caliente activamente al paciente utilizando un dispositivo de aire forzado, caliente los fluidos intravenosos utilizando un dispositivo de fluidos de calor seco, y monitorea de manera continuada la Temperatura Central del paciente.<sup>6</sup>

### ¿Sabía que...?

La guía NICE en la actualidad recomienda la medida de Temperatura del paciente, a través tanto de medida directa como a través de una estimación directa de la Temperatura central que esté dentro de un rango de 0,5°C con respecto a medición directa.<sup>5</sup>

Las recomendaciones de NICE establecen que las estimaciones indirectas como por ejemplo a través de infrarrojos, no se deberían de utilizar para medir Temperatura Central.<sup>6</sup>

Soluciones de Normotermia

## La solución

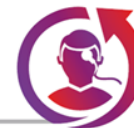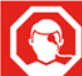

### Monitorizar Temperatura Central

Conocer la temperatura central de su paciente puede ayudarlo a dar una para ayudar a prevenir y evitar complicaciones.

El sistema de monitorización de temperatura ofrece un método continuo, no invasivo y preciso para medir fácilmente la temperatura central durante todo el proceso perioperatorio.

#### ¿Sabía que...?

NICE en la actualidad recomienda la tecnología de flujo de calor cero como una medición precisa de la temperatura central.<sup>6</sup>

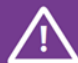

### Pre-caliente con calentamiento de aire forzado

La hipotermia perioperatoria es más fácil de prevenir que de tratarla.

El calentamiento previo a la inducción con el sistema de Normotermia calienta la periferia del paciente, que puede ayudar a reducir el descenso de temperatura causado por el caída de la temperatura por redistribución.<sup>14</sup>

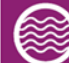

### Mantener la Normotermia del paciente

El sistema de Normotermia incluye una gama de mantas de calentamiento de aire forzado, proporcionando una solución confiable y efectiva para mantener la normotermia durante cada etapa del proceso quirúrgico.

La manta se adapta a todos los pacientes, a todos los procedimientos, todo el tiempo.

La infusión de fluidos fríos puede reducir la temperatura interna.<sup>4</sup> Los fluidos intravenosos que se calientan con el sistema de calentamiento de sangre y fluido ayudan a prevenir este descenso.

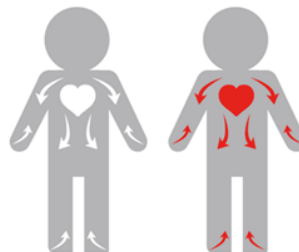

Soluciones de Normotermia

## Importancia del mantenimiento de la Normotermia

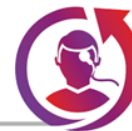

**Calentamiento del paciente**  
Una de las cosas menos costosas y rentables que puede hacer para mejorar los resultados.

Coste medio de una manta de calentamiento estándar para pacientes

= **£5<sup>7</sup>**

### Estancia en REA

El mantenimiento de la normotermia acorta el tiempo de recuperación postoperatoria<sup>9</sup>

**Coste= £44<sup>8</sup>**

### Transfusión de sangre

El mantenimiento de la normotermia reduce el sangrado quirúrgico y la necesidad de hemoderivados<sup>10</sup>

**Coste= £244<sup>8</sup>**

### Estancia hospitalaria

De media, los pacientes con hipotermia pasan un 19% más tiempo en el hospital<sup>9</sup>  
El mantenimiento de la normotermia reduce la duración de la estancia<sup>11</sup>

**Coste= £275<sup>8</sup>**

### Morbilidad cardíaca (isquemia)

Una temperatura central inferior a 35 ° C se asocia con un aumento de dos o tres veces en la isquemia miocárdica<sup>12</sup>

**Coste= £2014<sup>8</sup>**

### Infecciones de la herida quirúrgica: cirugía menor

El precalentamiento reduce la incidencia de infección de la herida<sup>13</sup>

**Coste= £950<sup>8</sup>**

### Infecciones de la herida quirúrgica: cirugía mayor

El mantenimiento de la normotermia reduce el riesgo de infección del sitio quirúrgico.<sup>11</sup> La tasa de infección en el Sitio Quirúrgico es tres veces mayor para pacientes con hipotermia (19% frente a 6%)<sup>11</sup>

**Coste= £3850<sup>8</sup>**

**Un paciente calentado es un paciente más seguro, más feliz y menos costoso**

Soluciones de Normotermia

# Análisis técnico de calentamiento del paciente

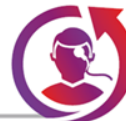

La práctica clínica y los costes han cambiado drásticamente en 20 años, es razonable revisar las estimaciones de los costes asociados con la hipotermia.<sup>19</sup> Las variables en las siguientes ecuaciones se definen de la siguiente manera:

CER = Tasa de eventos de control  
 EER = Tasa de eventos experimentales  
 ARR = reducción absoluta del riesgo  
 RR = riesgo relativo  
 NNT = Número necesario para tratar  
 n = número de pacientes  
 Co = costo del resultado (infecciones quirúrgicas)  
 Ct = Costo de la terapia (Manta de calentamiento)  
 V = índice de valor

Según el metanálisis de 1999, se pueden calcular los siguientes valores:

$$ARR = [EER - CER] = [0.0695 - 0.1907] = 0.121$$

$$RR = \frac{EER}{CER} = \frac{0.0695}{0.1907} = 0.36$$

$$NNT = \frac{1}{ARR} = \frac{1}{0.121} = 8.25$$

En 1999, el coste unitario estimado para tratar una infección en el sitio quirúrgico era de entre \$ 4500 y \$ 14,000, y el coste de una manta era de \$ 18,11,16,17. El índice de Valor se derivó como se muestra a continuación.

$$V = \left[ \frac{n}{[NNT]} \right] C_o - nC_t = n \left[ \left( \frac{C_o}{[NNT]} \right) - C_t \right]$$

$$\text{If } \left[ \left( \frac{C_o}{[NNT]} \right) - C_t \right] > 0$$

Coste del tratamiento sin calentamiento del paciente

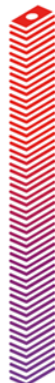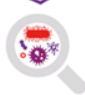

Coste del tratamiento con calentamiento del paciente

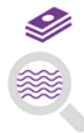

En 2016, se publicó un metanálisis reciente de la base de datos Cochrane de revisiones sistemáticas que contiene nuevas estimaciones del tamaño del efecto con dos ensayos más recientes y un total de 279 sujetos.<sup>20</sup> Un estudio de 2013 realizado en cuatro hospitales del sistema Johns Hopkins encontró un coste adicional medio de \$ 34,434 para tratar una infección en el sitio quirúrgico.<sup>21</sup> Un estudio de 2014 en pacientes con VA encontró costes adicionales de \$ 23,755 para tratar la infección en el Sitio Quirúrgico.<sup>20</sup> Usando el mismo análisis que antes se obtienen las siguientes estimaciones.

$$ARR = [EER - CER] = [0.0468 - 0.1275] = 0.081$$

$$RR = \frac{EER}{CER} = \frac{0.0468}{0.1275} = 0.36$$

$$NNT = \frac{1}{ARR} = \frac{1}{0.081} = 12.4$$

En 2017, el coste de una manta es de aproximadamente \$ 6. Aunque el NNT ha aumentado en aproximadamente un 50% desde 1994, el coste de una infección ha aumentado en más del 140%, y el RR se ha mantenido exactamente igual. El valor de la terapia de calentamiento todavía valía la pena el coste siguiendo la siguiente fórmula:

$$\left[ \left( \frac{C_o}{[NNT]} \right) - C_t \right] > 0.$$



Soluciones de Normotermia

# Referencias bibliográficas

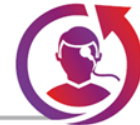

- 1 Brauer, A. et al. Realities of perioperative hypothermia: time for action, consensus document from an expert working group. Dec 2016. Unpublished.
- 2 Torossian, A. Survey on intraoperative temperature management in Europe, *European Journal of Anaesthesiology* 2007; 24: 668–675.
- 3 Young, V, Watson, M. Prevention of Perioperative Hypothermia in Plastic Surgery. *Aesthetic Surgery Journal*. 2006; 551–571.
- 4 Sessler DI, Kurz A. Mild Perioperative Hypothermia. *Anesthesiology News*. October 2008: 17–28.
- 5 Sessler, DI. Perioperative Heat Balance. *Anesth*. 2000; 92: 578–596.
- 6 National Institute for Health and Clinical Excellence. Inadvertent perioperative hypothermia: The management of inadvertent perioperative hypothermia in adults [CG65], published April 2008.
- 7 Based on NHS Supply Chain sell out price for the 3M full body blanket (model no: 300).
- 8 National Collaborating Centre for Nursing and Supportive Care commissioned by National Institute for Health and Clinical Excellence. *Clinical Practice Guideline: The management of inadvertent perioperative hypothermia in adults*. April 2008.
- 9 Lenhardt R, Marker E, Goll V, et al. Mild intraoperative hypothermia prolongs postanesthetic recovery. *Anesthesiology*.1997 ;87 (6): 1318–1323.
- 10 Schmied H, Kurz A, Sessler DI, Kozek S, Reiter A. Mild hypothermia increases blood loss and transfusion requirements during total hip arthroplasty. *Lancet*. 1996;347(8997):289–92.
- 11 Kurz A, Sessler DI, Lenhardt R. Perioperative normothermia to reduce the incidence of surgical wound infection and shorten hospitalisation. *N Engl J Med* 1996; 334: 1209–15.
- 12 Frank SM. Consequences of hypothermia. *Current Anaesth & Critical Care*. 2001; 12: 79–86.
- 13 Melling AC, Ali B, Scott EM, Leaper DJ. The effects of pre-operative warming on the incidence of wound infection after clean surgery: a randomised controlled trial. *Lancet* 2001; 358: 882–886.
- 14 Horn, E.P, Bein, B et al (2012) The effects of short time periods of pre-operative warming in the prevention of peri-operative hypothermia. *Anaesthesia*, Vol. 67, pp. 612–617.
- 15 Kurz A. When is forced-air warming cost-effective? In: Fleisher L, ed. *Evidence-based practice of anesthesiology*. 2nd ed: Elsevier Health Sciences; 2009.
- 16 Mahoney CB, Odom J. Maintaining intraoperative normothermia: a meta-analysis of outcomes with costs. *AANA J*. 1999;67(2):155-163.
- 17 Lewin S, Brettman LR, Holzman RS. Infections in hypothermic patients. *Arch. Intern. Med*. 1981;141(7):920-925.
- 18 Madrid E, Urrútiá G, Roqué i Figuls M, Pardo Hernandez H, Campos JM, Paniagua P, Maestre L, Alonso Coello P. Active body surface warming systems for preventing complications caused by inadvertent perioperative hypothermia in adults. *The Cochrane Library*. 2016;4(CD009016):1-217.
- 19 Shepard J, Ward W, Milstone A, et al. Financial impact of surgical site infections on hospitals: The hospital management perspective. *JAMA Surgery*. 2013;148(10):907-914.
- 20 Schweizer ML, Cullen JJ, Perencevich EN, Vaughan Sarrazin MS. Costs associated with surgical site infections in veterans affairs hospitals. *JAMA Surgery*. 2014;149(6):575-581.
